# Supplementary material for: Quality minus junk
Source: Springer Nature journal article supplement (doi:10.1007/s11142-018-9470-2), 2018-11-04
Supplement: MOESM1 [file 16253788]

## Sheet: I
	Ex Ante Quality Forecasts Fundamentals
		Panel A: Long Sample (U.S.)		P1	P2	P3	P4	P5	P6	P7	P8	P9	P10	H-L	H-L
		195706 - 201612		(Low)									(High)		t-stat
		Quality	t	-1.43553	-0.8346	-0.53047	-0.286	-0.06529	0.15425	0.38399	0.6474	0.99359	1.63675	3.07229	54.205
		Quality	t + 12M	-0.86031	-0.50832	-0.32984	-0.19565	-0.00815	0.15604	0.35673	0.54048	0.83085	1.46241	2.33602	40.3092
		Quality	t + 36M	-0.50112	-0.32173	-0.22979	-0.16042	-0.01882	0.10785	0.22932	0.41444	0.64754	1.21858	1.72782	19.3307
		Quality	t + 60M	-0.23302	-0.17277	-0.14264	-0.12142	-0.03758	0.0557	0.18262	0.30738	0.5156	1.06617	1.31197	13.9608
		Quality	t + 120M	-0.23355	-0.18396	-0.13567	-0.09263	-0.04439	0.06826	0.15516	0.32817	0.48084	0.90799	1.14154	12.964
		Profit	t + 120M	-0.37097	-0.23387	-0.12122	-0.02125	0.10115	0.12645	0.25618	0.32542	0.53214	1.07972	1.47468	22.4167
		Growth	t + 120M	-0.14861	-0.10916	-0.12504	-0.11225	-0.12848	-0.07718	-0.04678	0.01892	0.22625	0.40609	0.55803	5.9625
		Safety	t + 120M	-0.43165	-0.26771	-0.13707	-0.04177	0.04159	0.12868	0.23372	0.3727	0.60134	0.74543	1.17708	14.381
		Panel B: Broad Sample (Global)		P1	P2	P3	P4	P5	P6	P7	P8	P9	P10	H-L	H-L
		198906 - 201612		(Low)									(High)		t-stat
		Quality	t	-1.62788	-0.91273	-0.57447	-0.30812	-0.07648	0.15331	0.39079	0.66098	1.01192	1.59205	3.21993	44.1008
		Quality	t + 12M	-1.1637	-0.59677	-0.37537	-0.19662	-0.03417	0.1276	0.32458	0.52377	0.81675	1.33849	2.50219	28.4921
		Quality	t + 36M	-0.80936	-0.42855	-0.27927	-0.16925	-0.03523	0.06725	0.22097	0.39245	0.62712	1.07309	1.88245	17.5601
		Quality	t + 60M	-0.52519	-0.24341	-0.16643	-0.11965	-0.0251	0.02927	0.1499	0.28661	0.47468	0.86391	1.38909	13.4279
		Quality	t + 120M	-0.40832	-0.21655	-0.13182	-0.04687	-0.0028	0.05086	0.13099	0.26163	0.41543	0.65234	1.06025	16.7583
		Profit	t + 120M	-0.29396	-0.14314	-0.03241	0.04549	0.15564	0.18198	0.29029	0.37088	0.52348	0.93398	1.22724	17.2002
		Growth	t + 120M	-0.12035	-0.06058	-0.09573	-0.0826	-0.05105	-0.04926	-0.06266	0.02928	0.14602	0.20973	0.32442	6.2124
		Safety	t + 120M	-0.51011	-0.33545	-0.21177	-0.11844	-0.00631	0.04215	0.14755	0.30448	0.46299	0.57334	1.08303	12.6748

## Sheet: IIa
	Log (PB) as LHS
	Panel A: The Price of Quality
	Panel A	Long Sample (U.S., 195706 - 201612)							Broad Sample (Global, 198906 - 201612)
		(1)	(2)	(3)	(4)	(5)	(6)		(7)	(8)	(9)	(10)	(11)	(12)
	Quality	0.21989	0.244998	0.24007	0.219471	0.21989	0.244998		0.167223	0.201254	0.171108	0.166607	0.167223	0.202102
		10.0673	20.9236	10.0573	11.7816	10.0673	20.9236		14.057	26.3821	13.5901	20.668	14.057	24.9672
	Firm size	.	0.336602	.	0.333377	.	0.336602		.	0.336269	.	0.33236	.	0.321758
		.	20.922	.	18.8719	.	20.922		.	12.8127	.	12.4925	.	10.8336
	1-year return	.	0.210478	.	0.21353	.	0.210478		.	0.26006	.	0.263062	.	0.261185
		.	12.5874	.	12.3926	.	12.5874		.	24.0444	.	27.4811	.	23.6759
	Firm age	.	-0.1814	.	-0.17405	.	-0.1814		.	-0.12495	.	-0.11034	.	-0.12898
		.	-7.59539	.	-6.80651	.	-7.59539		.	-5.22791	.	-4.92463	.	-7.22555
	Profit Uncertainty	.	0.376053	.	0.351969	.	0.376053		.	0.405455	.	0.346496	.	0.40529
		.	15.5372	.	15.1467	.	15.5372		.	28.3628	.	19.9188	.	27.6682
	Dividend payer	.	-0.15547	.	-0.07389	.	-0.15547		.	-0.19869	.	-0.10016	.	-0.20227
		.	-7.67719	.	-3.49743	.	-7.67719		.	-6.64132	.	-2.9314	.	-4.73619
	Profit Uncertainty	.	-0.19707	.	-0.20452	.	-0.19707		.	-0.21993	.	-0.19887	.	-0.23023
	x Dividend payer	.	-10.884	.	-7.78074	.	-10.884		.	-15.1257	.	-8.05267	.	-13.9797
	Average AdjR2	0.093445	0.414407	0.259244	0.487698	0.093445	0.414407		0.094869	0.364895	0.196229	0.4309	0.029243	0.339997
	Nobs (years)	60	54	60	54	60	54		28	28	28	28	28	28
	Industry FE			X	X						X	X
	Country FE								X	X	X	X
	Firm FE					X	X						X	X

## Sheet: IIb
	Table 3. The Price of Quality. (i.e. Fama-MacBeth)
	log (PB) as LHS
	Panel B: The Price of Each Quality Component
	Panel B	Long Sample (U.S., 195706 - 201612)						Broad Sample (Global, 198906 - 201612)
		(1)	(2)	(3)	(4)	(5)		(6)	(7)	(8)	(9)	(10)
	Profitability	0.188682	.	.	0.105821	0.137341		0.13363	.	.	0.062905	0.080662
		10.3128	.	.	6.6488	9.67041		19.7358	.	.	8.75399	11.6844
	Growth		0.179104	.	0.11801	0.126728		.	0.139599	.	0.105255	0.129892
			12.3656	.	14.7251	24.7648		.	20.2328	.	13.3344	22.761
	Safety		.	0.133187	0.037351	0.022767		.	.	0.100834	0.036504	0.038608
			.	8.23463	3.68714	2.16778		.	.	9.88675	3.86239	3.05243
	Firm size	0.337443	0.334349	0.376323	0.325471	0.324047		0.330582	0.329695	0.360532	0.326058	0.314019
		17.4171	19.2801	22.7931	18.3584	18.5624		11.8203	12.5642	14.2327	11.8954	9.93772
	1-year return	0.220259	0.224175	0.226191	0.213816	0.211304		0.27091	0.274467	0.272517	0.264802	0.263386
		12.4159	11.8863	13.5769	11.8705	11.9931		26.4434	26.1283	28.2792	28.1722	24.6961
	Firm age	-0.18462	-0.16281	-0.20254	-0.16956	-0.17811		-0.116	-0.10626	-0.12167	-0.11465	-0.1382
		-6.78693	-6.30421	-7.07451	-7.03617	-7.40724		-4.84191	-4.29864	-5.1414	-4.95997	-6.76736
	Profit Uncertainty	0.309532	0.313891	0.355485	0.333479	0.34788		0.320594	0.313295	0.350536	0.339042	0.391019
		11.479	13.3308	12.676	14.2662	13.5318		17.5323	16.2381	23.7659	23.3176	36.3775
	Dividend payer	-0.07851	-0.013	-0.06293	-0.05928	-0.12914		-0.09928	-0.05374	-0.0948	-0.08122	-0.17306
		-3.77381	-0.55443	-2.80441	-3.1836	-6.30923		-3.07901	-1.61216	-2.75686	-2.63516	-4.30492
	Profit Uncertainty	-0.19043	-0.20613	-0.19565	-0.20542	-0.19824		-0.19883	-0.19638	-0.19828	-0.20443	-0.2331
	x Dividend payer	-6.52232	-8.01715	-6.26941	-8.12634	-10.9281		-8.02827	-7.3999	-8.10357	-8.31418	-13.6336
	Average AdjR2	0.479495	0.478709	0.447037	0.495875	0.428532		0.423289	0.430964	0.415109	0.436078	0.350161
	Nobs (years)	54	54	54	54	54		28	28	28	28	28
	Industry FE				X						X
	Country FE							X	X	X	X
	Firm FE					X						X

## Sheet: III
		10- value weighted portfolios sorted on quality composite
		Panel A: Long Sample	P1	P2	P3	P4	P5	P6	P7	P8	P9	P10	H-L
		U.S. , 195707 - 201612	(Low)									(High)
		Excess return	0.27778	0.43348	0.43128	0.51015	0.54728	0.52506	0.47927	0.61539	0.52192	0.69875	0.42097
			1.09104	2.10252	2.29389	2.88082	3.14489	3.17934	2.93838	3.71483	3.1058	4.10851	2.56227
		CAPM alpha	-0.43602	-0.17199	-0.12548	-0.01676	0.03401	0.03216	-0.00941	0.11707	0.01284	0.20351	0.63952
			-3.7244	-2.28515	-1.93933	-0.28554	0.55148	0.60303	-0.18503	2.35755	0.27584	3.10929	4.26143
		3-factor alpha	-0.57243	-0.27825	-0.21135	-0.09688	-0.0336	-0.02008	-0.01984	0.09838	0.04572	0.31252	0.88496
			-6.52081	-4.44644	-3.68251	-1.88925	-0.60493	-0.40864	-0.38884	1.99454	1.01008	5.89997	8.23281
		4-factor alpha	-0.58909	-0.38731	-0.27691	-0.1922	-0.11188	-0.12311	-0.09621	0.11046	0.0744	0.46381	1.0529
			-6.298	-5.90252	-4.55879	-3.58255	-1.91038	-2.40766	-1.79096	2.102	1.54578	8.59255	9.31143
		Beta	1.27664	1.16334	1.09575	1.05545	1.03968	0.9983	0.96591	0.9731	0.97183	0.91769	-0.35895
		Sharpe Ratio	0.14144	0.27257	0.29738	0.37347	0.40771	0.41217	0.38093	0.48159	0.40264	0.53263	0.33217
		Information Ratio	-0.88284	-0.82741	-0.63904	-0.5022	-0.26779	-0.3375	-0.25105	0.29466	0.21668	1.20449	1.30526
		Adjusted R2	0.88391	0.91288	0.91022	0.92105	0.90259	0.91755	0.9067	0.91345	0.92944	0.91336	0.59257
		Panel B: Broad Sample	P1	P2	P3	P4	P5	P6	P7	P8	P9	P10	H-L
		Global , 198907 - 201612	(Low)									(High)
		Excess return	0.11333	0.3317	0.39023	0.46314	0.45714	0.46296	0.56686	0.59436	0.54826	0.63002	0.51669
			0.32096	1.1079	1.43473	1.80898	1.88493	1.98983	2.52088	2.65163	2.45497	2.79616	2.48622
		CAPM alpha	-0.41476	-0.12787	-0.03314	0.06342	0.07796	0.09922	0.21305	0.24644	0.20406	0.29379	0.70855
			-2.50423	-1.01286	-0.31034	0.64174	0.83972	1.11358	2.57379	2.75711	2.20966	2.7576	4.04602
		3-factor alpha	-0.51174	-0.21338	-0.10716	0.01004	0.00647	0.0377	0.19428	0.22996	0.24713	0.39808	0.90982
			-3.40174	-1.83743	-1.06028	0.1043	0.0744	0.44508	2.34084	2.56255	2.72153	4.2028	6.65834
		4-factor alpha	-0.42876	-0.27171	-0.17441	-0.06465	-0.05332	-0.03948	0.10693	0.18725	0.26904	0.55841	0.98717
			-2.63125	-2.159	-1.59506	-0.6216	-0.56732	-0.43229	1.19784	1.925	2.72936	5.56917	6.67053
		Beta	1.20069	1.08398	1.0165	0.9697	0.91921	0.88702	0.86604	0.8493	0.83041	0.79215	-0.40854
		Sharpe Ratio	0.06121	0.21127	0.27359	0.34496	0.35944	0.37944	0.48071	0.50565	0.46815	0.53321	0.4741
		Information Ratio	-0.55339	-0.45407	-0.33546	-0.13073	-0.11932	-0.09092	0.25192	0.40486	0.57402	1.17128	1.40291
		Adjusted R2	0.82276	0.85296	0.8655	0.86264	0.87502	0.87179	0.86885	0.84328	0.83787	0.83519	0.57799

## Sheet: IV
		Panel A: Long Sample (U.S. , 195707 - 201612)					Panel B: Broad Sample (Global , 198907 - 201612)
		QMJ	Profitability	Safety	Growth		QMJ	Profitability	Safety	Growth
	Excess Returns	0.288	0.254	0.225	0.171		0.384	0.386	0.229	0.15
		3.624	3.685	2.44	2.46		3.333	4.335	1.716	1.96
	CAPM-alpha	0.394	0.316	0.404	0.16		0.51	0.48	0.398	0.158
		5.426	4.747	5.52	2.283		5.757	6.883	4.488	2.051
	3-factor alpha	0.512	0.403	0.52	0.283		0.606	0.509	0.514	0.24
		8.898	6.97	9.064	5.174		8.752	8.113	7.914	3.625
	4-factor alpha	0.602	0.504	0.514	0.457		0.607	0.468	0.392	0.395
		9.952	8.324	8.394	8.29		8.065	6.894	5.731	5.776
	MKT	-0.201	-0.119	-0.316	-0.036		-0.266	-0.193	-0.348	-0.031
		-14.352	-8.47	-22.297	-2.806		-15.775	-12.726	-22.742	-2.055
	SMB	-0.262	-0.22	-0.301	-0.035		-0.319	-0.275	-0.226	-0.118
		-11.918	-10.012	-13.553	-1.76		-8.706	-8.322	-6.789	-3.558
	HML	-0.369	-0.292	-0.28	-0.489		-0.299	-0.057	-0.252	-0.384
		-15.851	-12.571	-11.91	-23.094		-8.59	-1.827	-7.984	-12.172
	UMD	-0.085	-0.095	0.006	-0.163		-0.001	0.038	0.113	-0.143
		-4.34	-4.87	0.324	-9.173		-0.019	1.561	4.633	-5.86
	Sharpe Ratio	0.47	0.478	0.316	0.319		0.636	0.827	0.327	0.374
	Information Ratio	1.395	1.167	1.177	1.162		1.696	1.45	1.205	1.215
	Adjusted R2	0.502	0.337	0.622	0.463		0.646	0.517	0.781	0.34

## Sheet: V
		Panel A: Long Sample (U.S. ,196307 - 201612)					Panel B: Broad Sample (Global , 199011 - 201612)
		QMJ	Profitability	Safety	Growth		QMJ	Profitability	Safety	Growth
	Excess Returns	0.285	0.292	0.203	0.149		0.322	0.366	0.185	0.118
		3.303	3.924	2.041	2.018		2.703	4.073	1.355	1.508
	5-factor alpha	0.381	0.293	0.384	0.299		0.325	0.287	0.266	0.193
		7.706	6.845	5.746	6.598		5.057	5.829	3.478	3.344
	6-factor alpha	0.334	0.284	0.288	0.265		0.28	0.278	0.157	0.181
		6.812	6.536	4.491	5.851		4.459	5.576	2.415	3.121
	MKT	-0.169	-0.082	-0.276	-0.05		-0.241	-0.149	-0.32	-0.062
		-14.069	-7.721	-17.599	-4.47		-13.915	-10.841	-17.792	-3.835
	SMB	-0.108	-0.067	-0.192	0.028		-0.173	-0.173	-0.167	-0.077
		-6.511	-4.572	-8.886	1.832		-5.413	-6.839	-5.033	-2.611
	HML	-0.257	-0.289	-0.194	-0.26		-0.254	-0.096	-0.251	-0.108
		-10.851	-13.803	-6.26	-11.884		-6.422	-3.046	-6.098	-2.931
	CMA	-0.047	0.092	0.044	-0.363		0.048	0.061	0.128	-0.41
		-1.385	3.041	0.972	-11.462		0.985	1.574	2.541	-9.097
	RMW	0.552	0.576	0.32	0.333		0.652	0.588	0.461	0.321
		24.068	28.366	10.665	15.7		13.63	15.494	9.275	7.236
	UMD	0.065	0.013	0.133	0.046		0.079	0.017	0.189	0.019
		5.683	1.247	8.867	4.368		4.92	1.32	11.298	1.285
	Sharpe Ratio	0.452	0.536	0.279	0.276		0.528	0.796	0.265	0.295
	Information Ratio	0.997	0.957	0.657	0.856		0.968	1.21	0.524	0.677
	Adjusted R2	0.717	0.701	0.633	0.668		0.771	0.747	0.811	0.544

## Sheet: V (New Website)
		Panel A: Long Sample (U.S. ,196307 - 201612)						Panel B: Broad Sample (Global , 199011 - 201612)
		QMJ	Profitability	Safety	Growth	Payout		QMJ	Profitability	Safety	Growth	Payout
	Excess Returns	0.383	0.292	0.203	0.149	0.312		0.412	0.366	0.185	0.118	0.311
		4.289	3.924	2.041	2.018	3.734		3.359	4.073	1.355	1.508	3.019
	5-factor alpha	0.408	0.293	0.384	0.299	0.107		0.344	0.287	0.266	0.193	0.118
		8.327	6.845	5.746	6.598	2.513		5.626	5.829	3.478	3.344	2.694
	6-factor alpha	0.362	0.284	0.288	0.265	0.092		0.306	0.278	0.157	0.181	0.112
		7.452	6.536	4.491	5.851	2.133		5.092	5.576	2.415	3.121	2.531
	MKT	-0.176	-0.082	-0.276	-0.05	-0.095		-0.239	-0.149	-0.32	-0.062	-0.129
		-14.818	-7.721	-17.599	-4.47	-8.987		-14.418	-10.841	-17.792	-3.835	-10.574
	SMB	-0.141	-0.067	-0.192	0.028	-0.114		-0.217	-0.173	-0.167	-0.077	-0.126
		-8.554	-4.572	-8.886	1.832	-7.781		-7.079	-6.839	-5.033	-2.611	-5.604
	HML	-0.205	-0.289	-0.194	-0.26	0.065		-0.167	-0.096	-0.251	-0.108	0.075
		-8.738	-13.803	-6.26	-11.884	3.118		-4.389	-3.046	-6.098	-2.931	2.707
	CMA	0.131	0.092	0.044	-0.363	0.546		0.211	0.061	0.128	-0.41	0.504
		3.852	3.041	0.972	-11.462	18.049		4.534	1.574	2.541	-9.097	14.749
	RMW	0.585	0.576	0.32	0.333	0.379		0.667	0.588	0.461	0.321	0.366
		25.689	28.366	10.665	15.7	18.717		14.55	15.494	9.275	7.236	10.886
	UMD	0.063	0.013	0.133	0.046	0.021		0.064	0.017	0.189	0.019	0.01
		5.552	1.247	8.867	4.368	2.057		4.179	1.32	11.298	1.285	0.895
	Sharpe Ratio	0.586	0.536	0.279	0.276	0.511		0.657	0.796	0.265	0.295	0.59
	Information Ratio	1.091	0.957	0.657	0.856	0.312		1.105	1.21	0.524	0.677	0.549
	Adjusted R2	0.738	0.701	0.633	0.668	0.764		0.801	0.747	0.811	0.544	0.848

## Sheet: VI
	Panel A: Long Sample	Return					t-statistics
	U.S., 195707 - 201612	Excess Return	CAPM Alpha	3-Factor Alpha	4-Factor Alpha		Excess Return	CAPM Alpha	3-Factor Alpha	4-Factor Alpha		Number of months
	All Periods	0.28813	0.39401	0.51205	0.6024		3.62361	5.42584	8.89808	9.95205		714
	Recession	0.49766	0.47776	0.73572	0.81751		2.00466	2.16118	4.46592	4.96191		110
	Expansion	0.24998	0.38071	0.49405	0.55597		3.03292	4.99305	8.25991	8.69475		604
	Severe bear market	0.02672	0.3005	0.8167	0.77808		0.03144	0.39886	1.69065	1.50146		21
	Severe bull Market	0.18046	0.18493	0.32225	0.49718		1.13639	1.20783	2.45633	3.55502		144
	Low volatility	0.42514	0.63128	0.71156	0.77161		2.40657	4.21142	5.77523	6.1639		245
	High volatility	0.13181	0.20634	0.41492	0.55731		1.24317	1.92392	5.70444	7.16414		227
	Spike up in volatility	0.48146	0.55898	0.57528	0.71738		3.1988	4.15351	5.18274	6.32322		240
	Spike down in volatility	-0.00485	0.22648	0.47574	0.46953		-0.03638	1.79851	5.05689	4.57885		238
	Panel B: Broad Sample	Return					t-statistics
	Global, 198907 - 201612	Excess Return	CAPM Alpha	3-Factor Alpha	4-Factor Alpha		Excess Return	CAPM Alpha	3-Factor Alpha	4-Factor Alpha		Number of months
	All Periods	0.38443	0.51024	0.60637	0.60691		3.33341	5.75745	8.75201	8.06542		330
	Recession	0.90964	0.59416	1.22395	1.22583		1.83903	1.69519	5.17846	5.14545		37
	Expansion	0.31811	0.50461	0.5883	0.56281		2.79704	5.55699	8.43509	7.24436		293
	Severe bear market	0.57018	0.92995	1.22968	1.29542		0.52684	1.78092	5.3323	4.64006		15
	Severe bull Market	0.64978	0.59137	0.7144	0.88966		2.37662	2.3815	3.97523	3.96932		38
	Low volatility	0.52881	0.64994	0.81177	0.79259		2.31289	4.09345	6.65268	6.29162		139
	High volatility	0.09686	0.1938	0.37756	0.49762		0.66866	1.47714	3.22187	3.71746		92
	Spike up in volatility	0.52556	0.64168	0.61027	0.63591		2.40407	3.85965	4.78516	4.81013		115
	Spike down in volatility	0.1743	0.38538	0.65127	0.61168		0.88052	2.46506	5.02489	4.26782		116

## Sheet: VII
	10- value weighted portfolios sorted on quality composite
	ex ante expected returns from IBES target prices															Panel A: United States, 1999 – 2016
	For each portfolio, you compute ex ante expected returns using IBES consensus target prices
		Panel A: United States	P1	P2	P3	P4	P5	P6	P7	P8	P9	P10	H-L	H-L
			(Low)									(High)		t-statistics
		Price (scaled by book)	2.68829	2.293	2.4554	2.8032	3.1043	3.0242	3.2954	3.813	4.5789	7.0484	4.3601	4.1958
		Mean price target (scaled by book)	3.44781	2.7855	2.9353	3.3071	3.6361	3.4953	3.8462	4.4305	5.2821	8.2648	4.8169	3.8335
		Median price target (scaled by book)	3.42893	2.7772	2.9274	3.3064	3.6322	3.4879	3.8495	4.4232	5.2825	8.2767	4.8478	3.8538
		Mean Implied Expected Return	0.26297	0.2	0.1891	0.1701	0.1656	0.1579	0.1629	0.1643	0.1525	0.1547	-0.1083	-3.7114
		Median Implied Expected Return	0.2534	0.1946	0.185	0.1691	0.163	0.1553	0.1633	0.1642	0.155	0.1566	-0.0968	-3.8007
		Dispersion	0.82635	0.9031	0.9492	0.9609	0.9687	0.9677	0.9737	0.9656	0.9682	0.9543	0.1279	6.0567
		Number of estimates	9.10084	10.6714	12.077	12.0415	12.4072	13.1245	14.3109	13.3688	14.4715	17.4304	8.3295	8.4784
		Mean Forecast Error	-0.0302	-0.0192	-0.0148	-0.0107	-0.0113	-0.0102	-0.0083	-0.0076	-0.0071	-0.0049	0.0253	3.4576
		Dispersion (EPS)	0.5509	0.3282	0.224	0.1414	0.1087	0.0911	0.0844	0.0591	0.0531	0.0342	-0.5167	-8.0652
		Number of estimates (EPS)	15.3617	18.0528	19.3043	20.2194	20.7751	20.8769	22.0391	23.0552	21.7945	25.562	10.2002	10.2813
		Realized future 12-month return	0.02354	0.0587	0.0668	0.0673	0.0705	0.097	0.0654	0.0932	0.0791	0.0676	0.0544	1.8222
		Panel B: Global	P1	P2	P3	P4	P5	P6	P7	P8	P9	P10	H-L	H-L
			(Low)									(High)		t-statistics
		Price (scaled by book)	2.73886	2.3668	2.4671	2.7848	3.0633	2.9832	3.2565	3.7533	4.4778	6.8531	4.1143	4.0769
		Mean price target (scaled by book)	3.56313	2.9221	2.9692	3.2935	3.5877	3.4453	3.7963	4.3596	5.1634	8.028	4.4649	3.6302
		Median price target (scaled by book)	3.54316	2.912	2.9597	3.2921	3.5838	3.4379	3.799	4.3525	5.1624	8.0383	4.4952	3.6487
		Mean Implied Expected Return	0.27964	0.2185	0.197	0.1737	0.1656	0.1567	0.1615	0.1639	0.1519	0.1536	-0.126	-5.0204
		Median Implied Expected Return	0.26931	0.2124	0.1919	0.1723	0.163	0.154	0.1616	0.1638	0.1539	0.1551	-0.1142	-5.2164
		Dispersion	0.82245	0.9026	0.9484	0.9617	0.9697	0.9693	0.975	0.9672	0.9695	0.9539	0.1314	6.7451
		Number of estimates	8.72198	10.4066	11.8443	11.8644	12.2556	12.9822	14.12	13.3167	14.3359	16.8531	8.1311	8.7582		Panel B: Global, 1999 – 2016
		Mean Forecast Error	-0.0295	-0.019	-0.0164	-0.0106	-0.0111	-0.0084	-0.006	-0.0066	-0.0065	-0.0046	0.0242	3.3445
		Dispersion (EPS)	0.5484	0.3375	0.3049	0.3478	0.1719	0.1209	0.1044	0.1005	0.063	0.0448	-0.5009	-7.3123
		Number of estimates (EPS)	15.1777	16.9474	18.3325	19.2722	19.8563	20.2069	21.2509	22.2053	20.8522	23.4009	8.2262	7.5472
		Realized future 12-month return	0.02473	0.0545	0.065	0.0673	0.0735	0.098	0.0688	0.0939	0.0834	0.0699	0.0577	1.9958
		Mean discounted price target (scaled by book)	2.92682	2.36459	2.49175	2.80737	3.08665	2.96713	3.26501	3.76101	4.48393	7.01592
		Median discounted price target (scaled by book)	2.91588	2.36167	2.48939	2.81168	3.08874	2.96603	3.27352	3.76138	4.49211	7.03831
			0.0846601	0.0299455	0.0138436	0.0030266	-0.00501344	-0.0192357	-0.00663849	-0.0135367	-0.0189537	-0.00143161
		3.49035	2.90462	2.34666	2.47286	2.78608	3.06325	2.94463	3.24025	3.7325	4.44993	6.96272
		3.51041	0.216335	0.0536584	0.0174582	-0.017117	-0.0410493	-0.079567	-0.0551495	-0.0805031	-0.128968	-0.0856778
			0.187007

## Sheet: VIII
	Time series regression
	using log bp
		Panel A: Long Sample (U.S. , 195707 - 201612)												Panel B: Broad Sample (Global, 198907 - 201612)
	Left-hand side		Return (t)			Return (t, t+12)			Return (t, t+36)			Return (t, t+60)			Return (t)			Return (t, t+12)			Return (t, t+36)			Return (t, t+60)
		Ret-Rf	Alpha		Ret-Rf	Alpha		Ret-Rf	Alpha		Ret-Rf	Alpha		Ret-Rf	Alpha		Ret-Rf	Alpha		Ret-Rf	Alpha		Ret-Rf	Alpha
	QMJ	-0.03161	-0.01462		-0.45842	-0.27114		-1.51876	-1.02781		-2.35135	-2.86648		-0.03459	0.02343		-0.8233	0.10418		-1.90915	0.16648		-1.40159	-3.57104
		-3.17755	-1.76151		-2.82099	-2.50105		-3.59726	-2.77727		-3.5896	-4.31771		-1.37911	1.49446		-2.64886	0.56361		-2.98974	0.3026		-4.08664	-6.31926
	Profitability	-0.03926	-0.02398		-0.49135	-0.33994		-1.5147	-1.19377		-2.26784	-2.68729		-0.03613	0.0172		-1.07561	-0.13905		-2.14226	-0.59191		-2.87526	-4.63899
		-3.27621	-2.14326		-2.95467	-2.41398		-3.61415	-2.84427		-3.18454	-4.16133		-1.58386	1.12631		-4.54658	-0.95145		-3.59983	-1.3654		-4.92524	-6.16353
	Growth	-0.02869	-0.00646		-0.33434	-0.07686		-0.98783	-0.11042		-0.412	-1.69832		-0.03381	0.00682		-0.64936	-0.05577		-2.34859	-0.7441		-2.67604	-2.59148
		-3.41595	-0.81413		-2.26179	-0.6979		-1.75833	-0.34051		-0.61313	-1.79595		-1.70022	0.51433		-3.77515	-0.31052		-4.05059	-1.08616		-2.19796	-3.86149
	Safety	-0.00735	-0.00146		-0.11024	-0.07186		-0.969	-0.72639		-2.28165	-2.52461		-0.02169	0.0014		-0.3404	0.03544		-0.6111	0.64011		0.69463	-1.32652
		-0.62821	-0.1215		-0.60749	-0.48495		-1.99144	-1.65299		-2.39344	-3.41304		-1.06843	0.10817		-1.22204	0.2655		-1.42428	4.05801		3.16866	-2.79268
	Average Adj R2	0.06259	0.03917		0.06978	0.04137		0.17313	0.08481		0.15521	0.31163		0.04796	0.0158		0.093	0.0114		0.20141	0.07455		0.19151	0.3625

[truncated: 29 more sheets: IX, A1, A1b, A2, A2c, A3, A3c, A4, A5, A6, A7, A7b, A8, A9, A10, A11, A12, A13, A14, Fig A1 …]
